# Supplementary material for: Engineering β-ketoamine covalent organic frameworks for photocatalytic overall water splitting
Source: PubMed Central journal article supplement (PMC9898260; doi:10.1038/s41467-023-36338-x), 2023-02-03
Supplement: 41467_2023_36338_MOESM1_ESM.pdf [file 41467_2023_36338_MOESM1_ESM.pdf]

## Supplementary Information

### Engineering $\beta$ -Ketoamine Covalent Organic Frameworks for Photocatalytic Overall Water Splitting

Yan Yang<sup>1,†</sup>, Xiaoyu Chu<sup>1,†</sup>, Hong-Yu Zhang<sup>1,†</sup>, Rui Zhang<sup>1</sup>, Yu-Han Liu<sup>1</sup>, Feng-Ming Zhang<sup>1,\*</sup>, Meng Lu<sup>2</sup>, Zhao-Di Yang<sup>1,\*</sup> & Ya-Qian Lan<sup>2,\*</sup>

<sup>1</sup>Heilongjiang Provincial Key Laboratory of CO<sub>2</sub> Resource Utilization and Energy Catalytic Materials, School of Material Science and Chemical Engineering, Harbin University of Science and Technology, Harbin, Heilongjiang 150080 (P. R. China).

<sup>2</sup>School of Chemistry, South China Normal University, Guangzhou, Guangdong 510006 (P. R. China).

<sup>†</sup>These authors contributed equally: Yan Yang, Xiaoyu Chu, Hong-Yu Zhang.

\*e-mail: zhangfm80@163.com; yangzhaodi@163.com; yqlan@m.scnu.edu.cn.

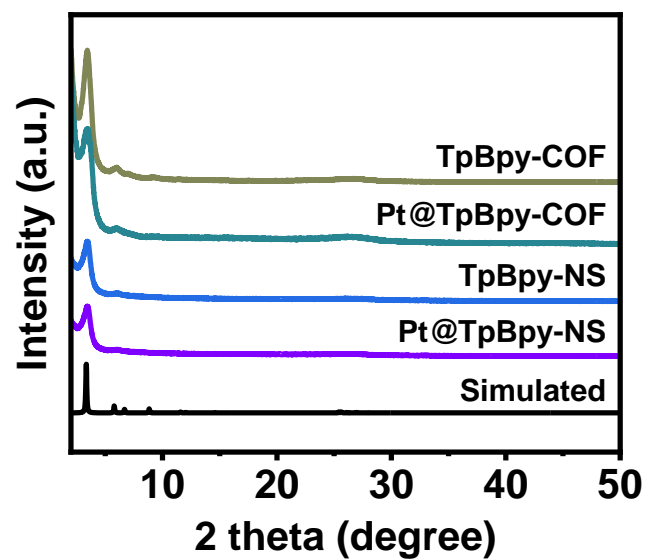

Supplementary Figure 1. PXRD patterns of TpBpy based materials.

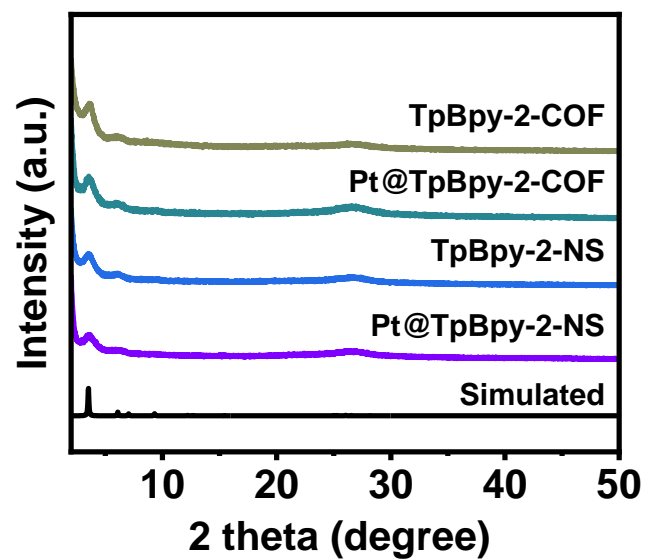

Supplementary Figure 2. PXRD patterns of TpBpy-2 based materials.

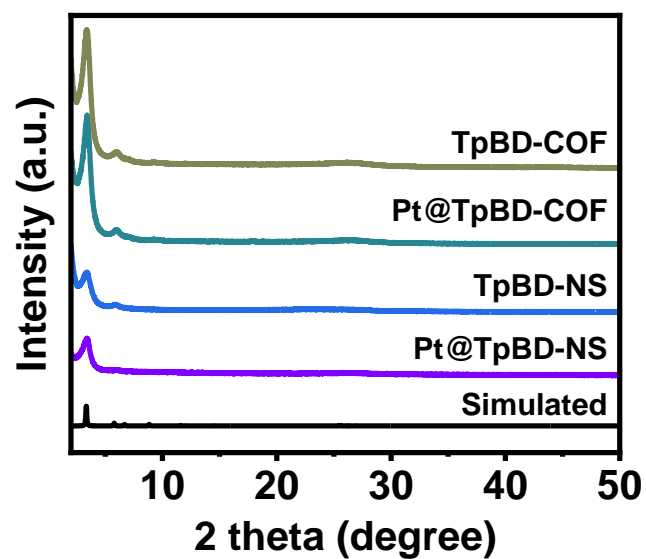

Supplementary Figure 3. PXRD patterns of TpBD based materials.

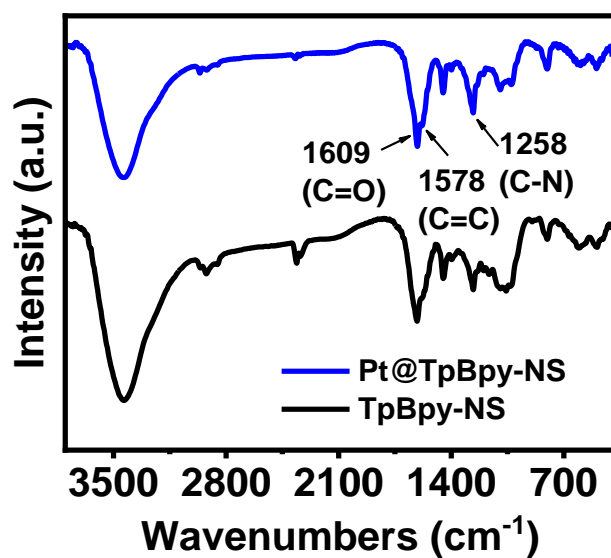

Supplementary Figure 4. Comparison of FT-IR spectra of TpBpy-NS and Pt(5%)@TpBpy-NS.

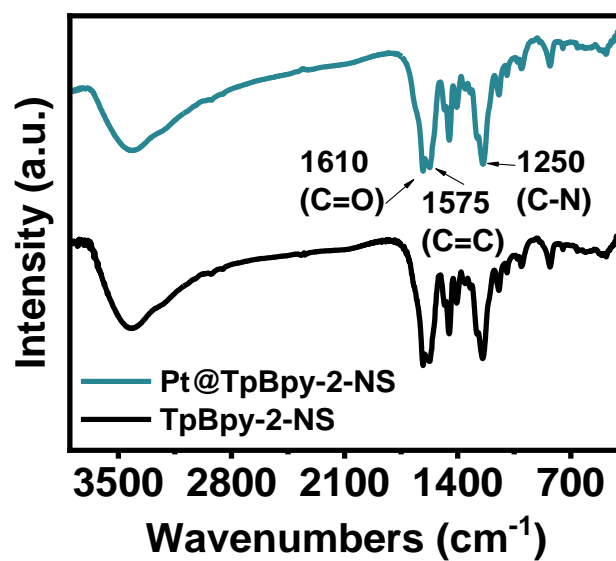

**Supplementary Figure 5.** Comparison of FT-IR spectra of TpBpy-2-NS and Pt(5%)@TpBpy-2-NS.

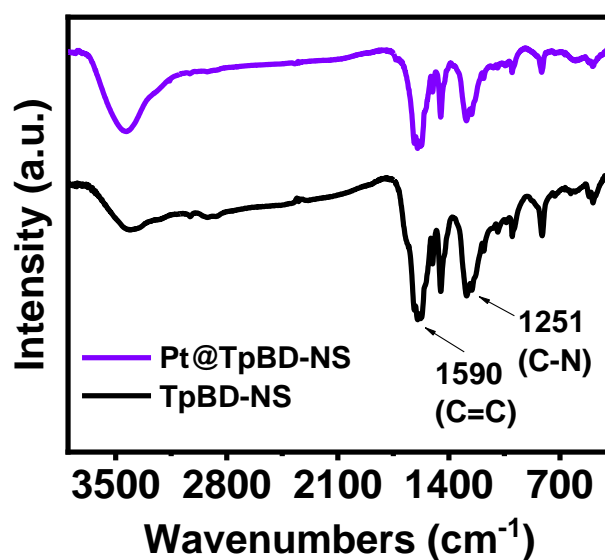

**Supplementary Figure 6.** Comparison of FT-IR spectra of TpBD-NS and Pt(5%)@TpBD-NS.

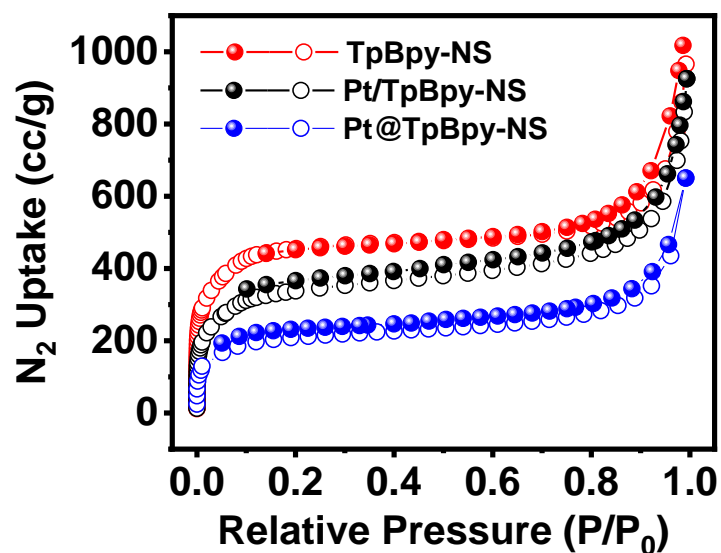

**Supplementary Figure 7.** Comparison of Nitrogen sorption curves of TpBpy-NS based materials measured at 77 K.

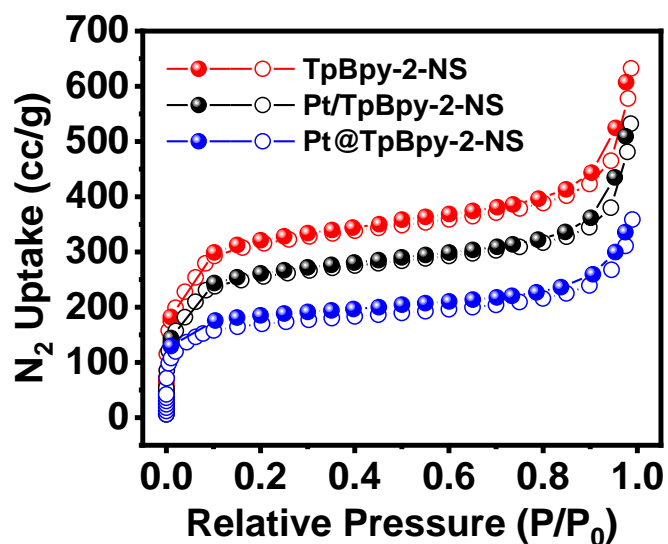

**Supplementary Figure 8.** Comparison of Nitrogen sorption curves of TpBpy-2-NS based materials measured at 77 K.

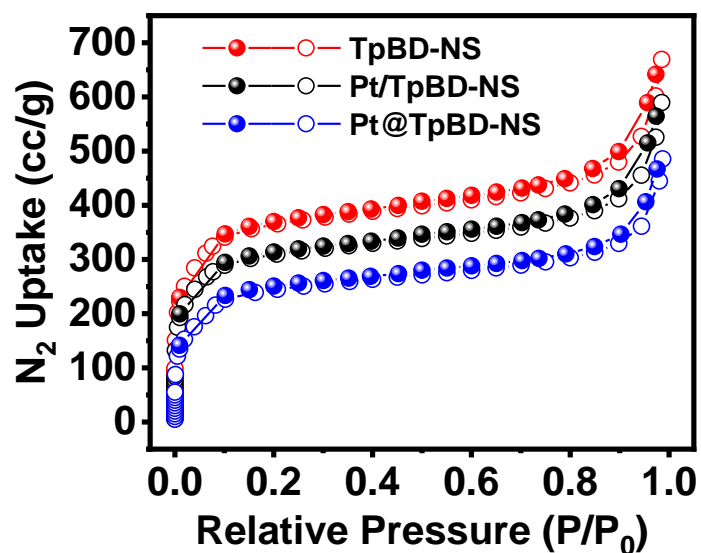

Supplementary Figure 9. Comparison of Nitrogen sorption curves of TpBD-NS based materials measured at 77 K.

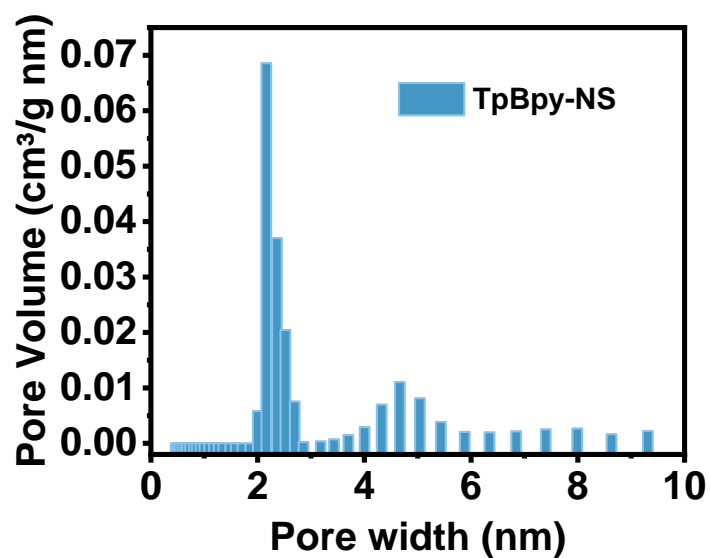

Supplementary Figure 10. The pore-size distribution profiles for the TpBpy-NS.

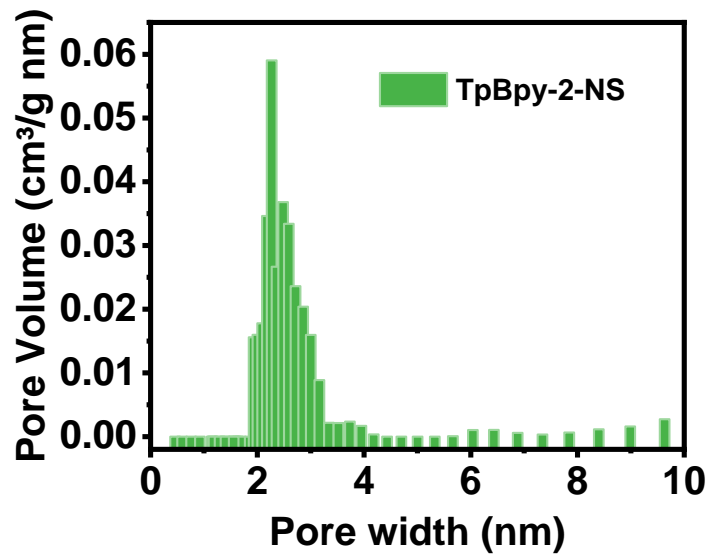

Supplementary Figure 11. The pore-size distribution profiles for the TpBpy-2-NS.

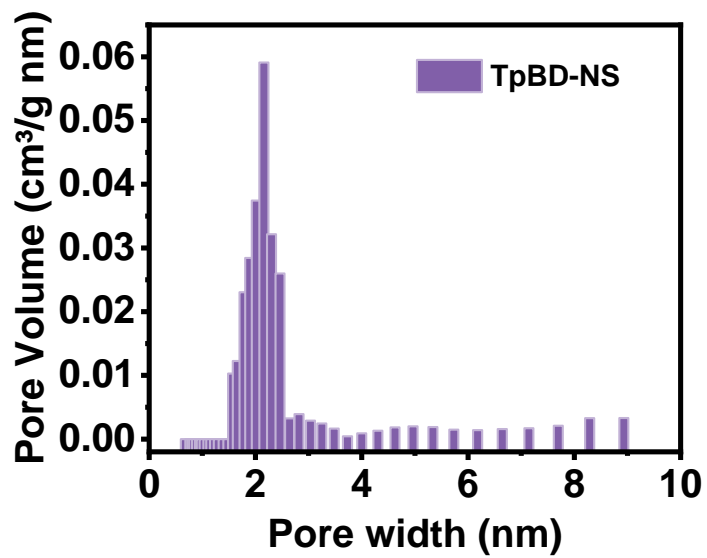

Supplementary Figure 12. The pore-size distribution profiles for the TpBD-NS.

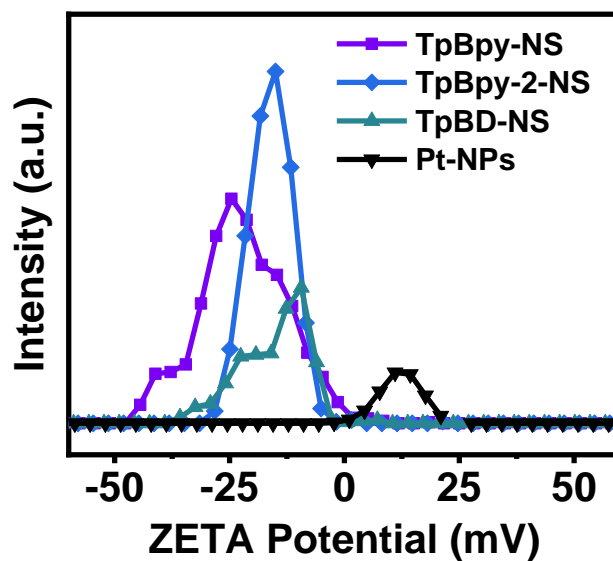

**Supplementary Figure 13.** ZETA potential of TpBpy-NS, TpBpy-2-NS, TpBD-NS and Pt NPs.

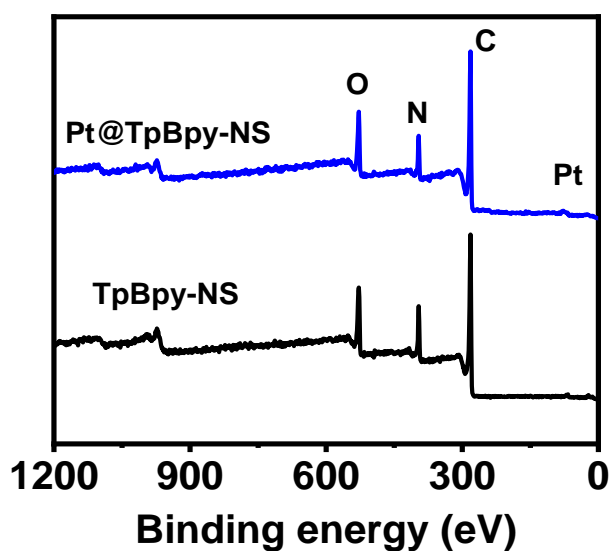

**Supplementary Figure 14.** Survey scan XPS profiles of TpBpy-NS and Pt@TpBpy-NS.



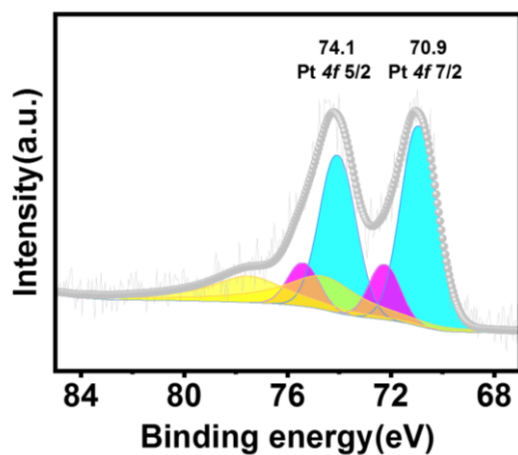

Supplementary Figure 15. Pt *4f* XPS spectra of Pt@TpBpy-NS.

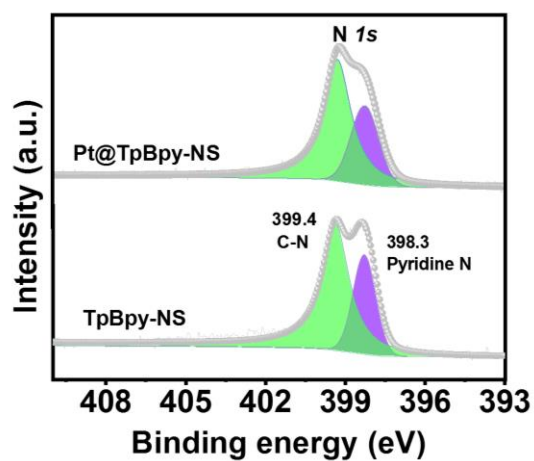

Supplementary Figure 16. N *1s* XPS spectra of TpBpy-NS and Pt@TpBpy-NS.

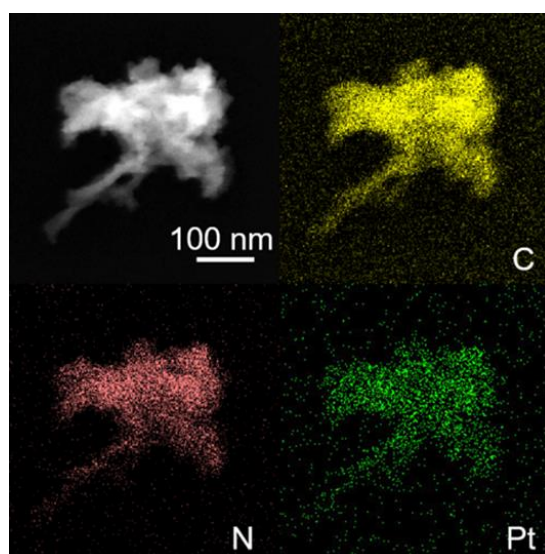

Supplementary Figure 17. TEM EDX mapping of Pt@TpBpy-NS.

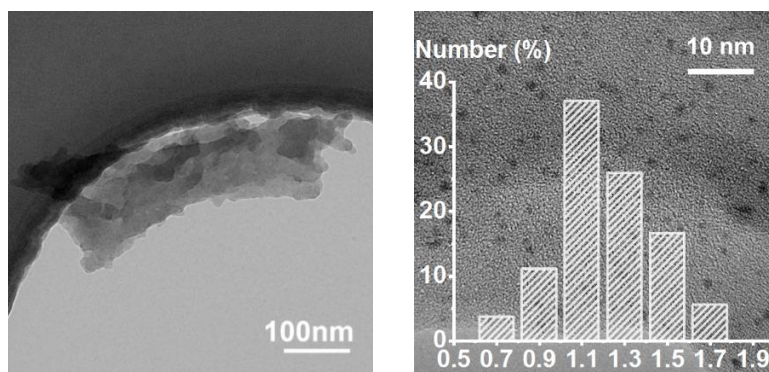

**Supplementary Figure 18.** TEM image of Pt@TpBpy-NS and the statistics of particle size distribution.

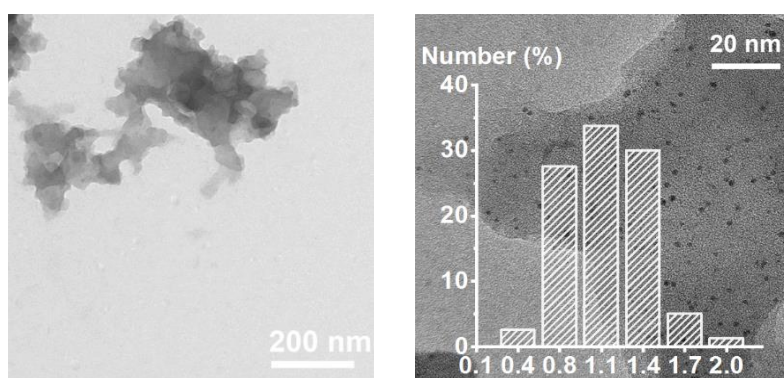

**Supplementary Figure 19.** TEM image of Pt@TpBpy-2-NS and the statistics of particle size distribution.

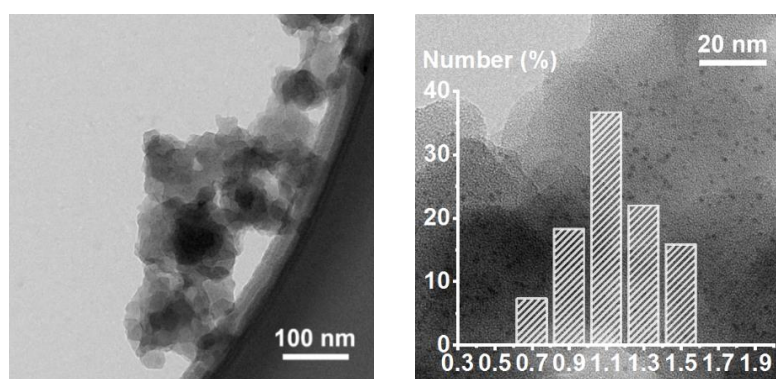

**Supplementary Figure 20.** TEM image of Pt@TpBD-NS and the statistics of particle size distribution.

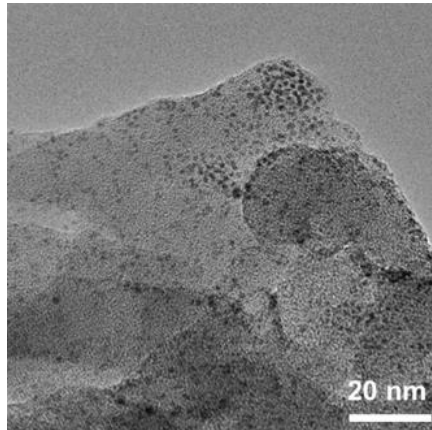

**Supplementary Figure 21.** TEM image of Pt/TpBpy-NS.

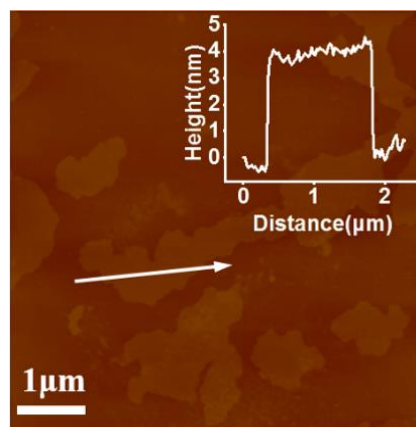

**Supplementary Figure 22.** AFM image of Pt@TpBpy-2-NS.

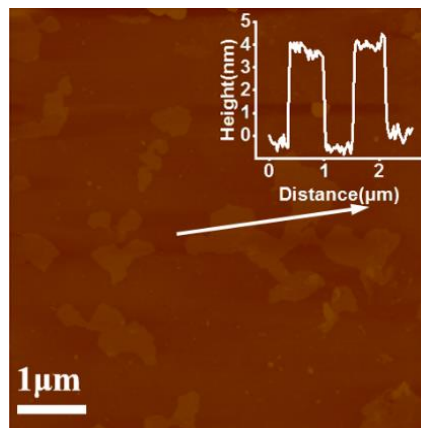

**Supplementary Figure 23.** AFM image of Pt@TpBD-NS.

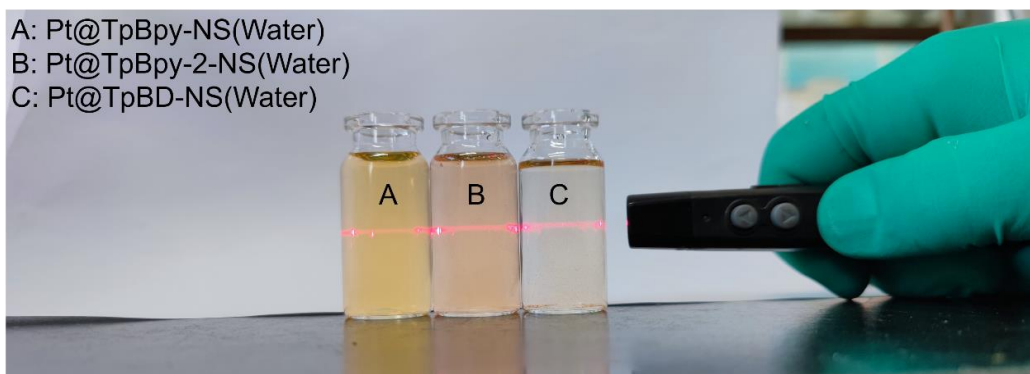

**Supplementary Figure 24.** Digital photo of the Tyndall effect.

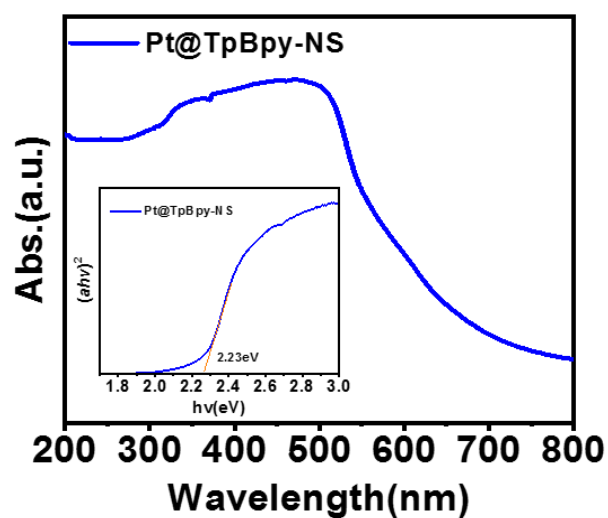

**Supplementary Figure 25.** The UV-vis DRS spectra of Pt@TpBpy-NS, inset Tauc plot for band gap calculation.

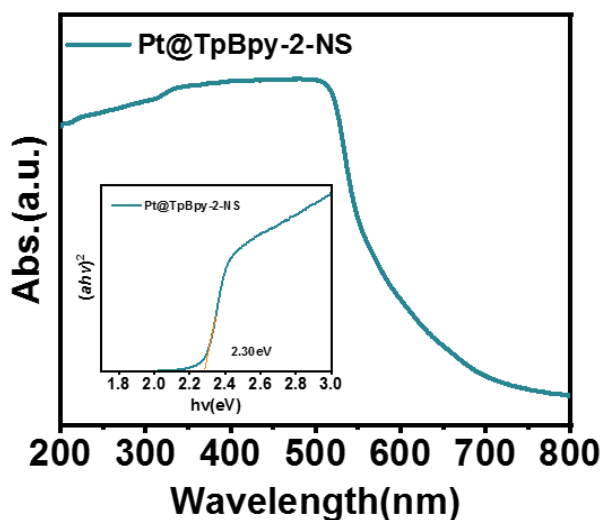

**Supplementary Figure 26.** The UV-vis DRS spectra of Pt@TpBpy-2-NS, inset Tauc plot for band gap calculation.

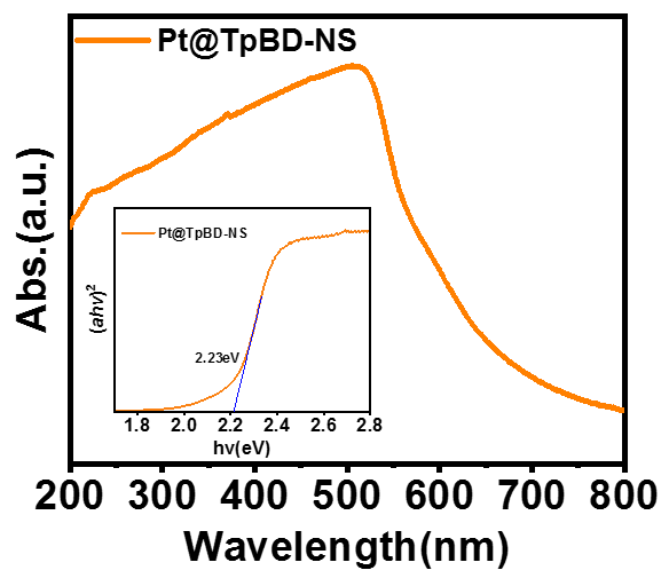

**Supplementary Figure 27.** The UV-vis DRS spectra of Pt@TpBD-NS, inset Tauc plot for band gap calculation.

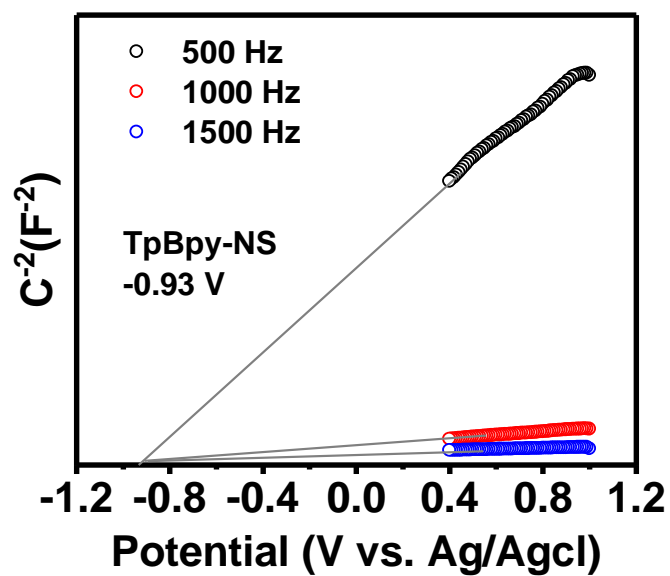

**Supplementary Figure 28.** Mott-Schottky plots of TpBpy-NS.

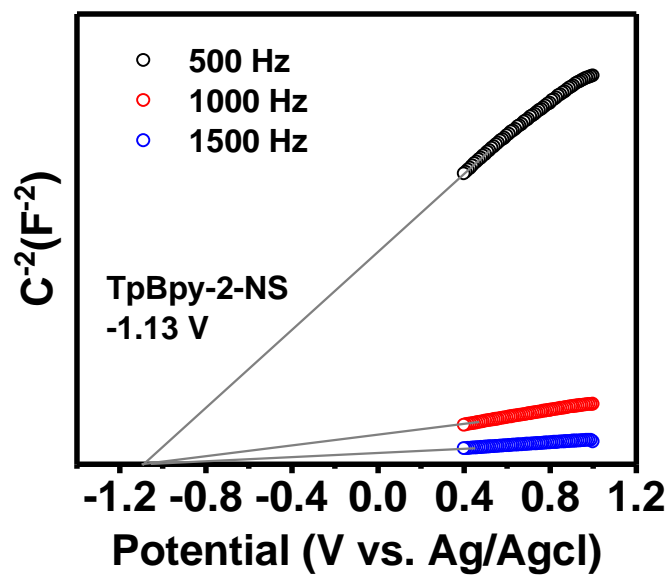

Supplementary Figure 29. Mott-Schottky plots of TpBpy-2-NS.

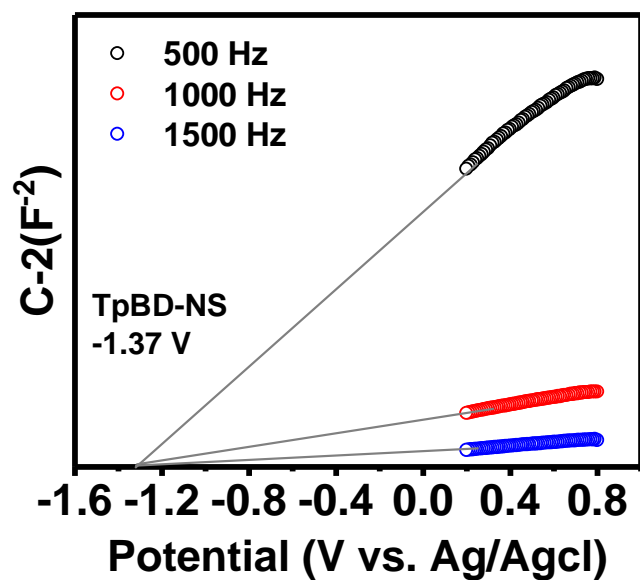

Supplementary Figure 30. Mott-Schottky plots of TpBD-NS.

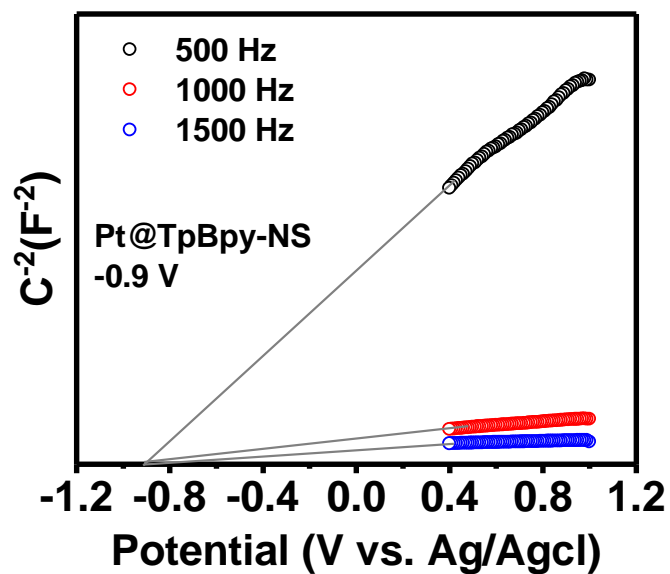

Supplementary Figure 31. Mott-Schottky plots of Pt@TpBpy-NS.

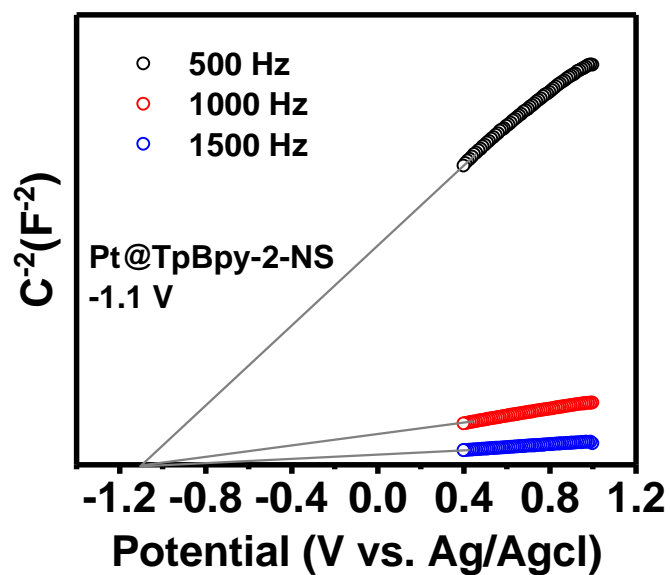

Supplementary Figure 32. Mott-Schottky plots of Pt@TpBpy-2-NS.

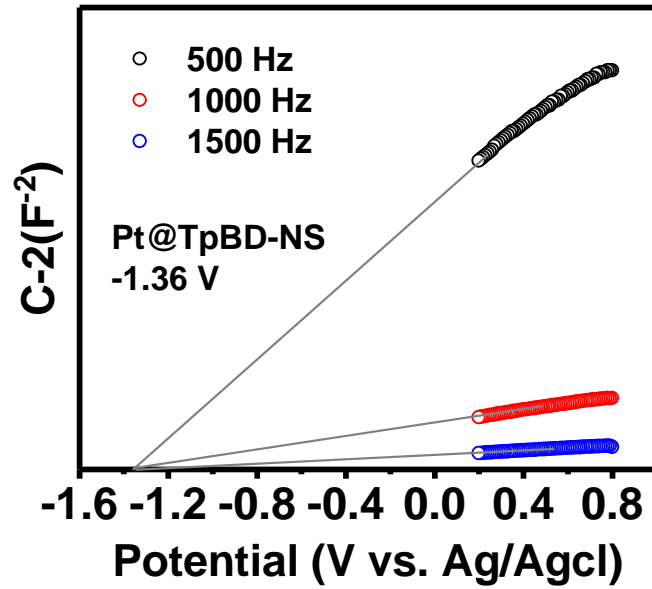

Supplementary Figure 33. Mott-Schottky plots of Pt@TpBD-NS.

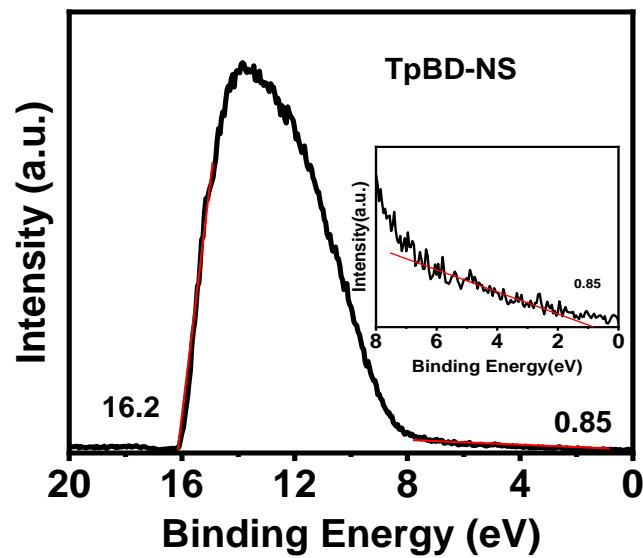

Supplementary Figure 34. The UPS spectra of TpBD-NS.



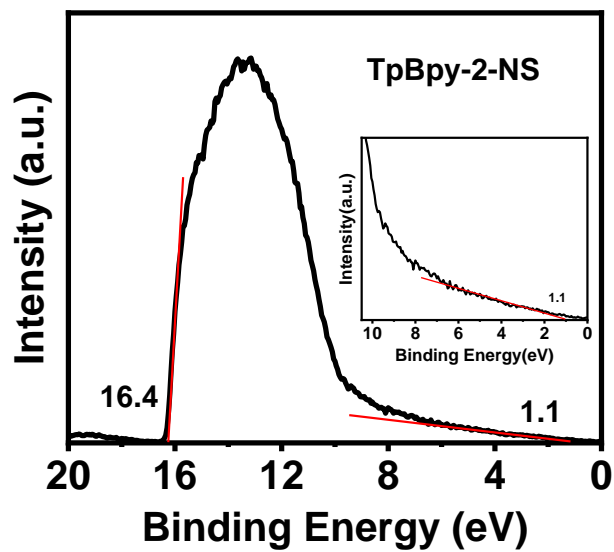

Supplementary Figure 35. The UPS spectra of TpBpy-2-NS.

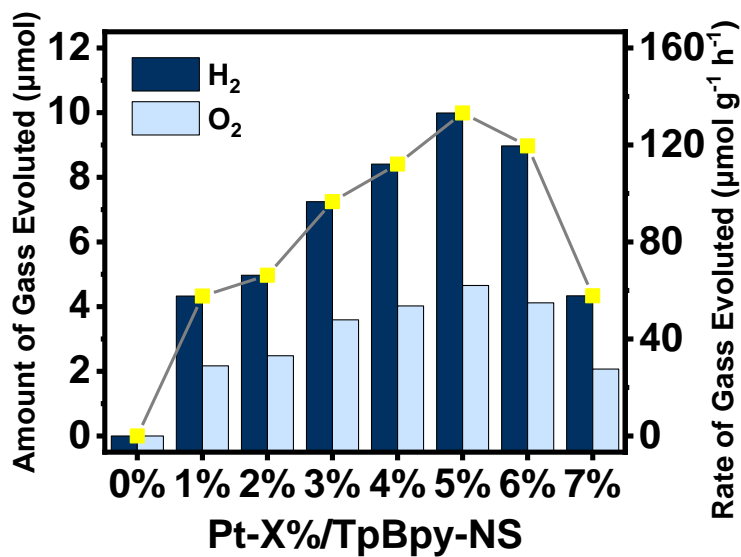

Supplementary Figure 36. The photocatalytic overall water splitting activities over Pt(X%)/TpBpy-NS (X = 1, 2, 3, 4, 5, 6, 7).

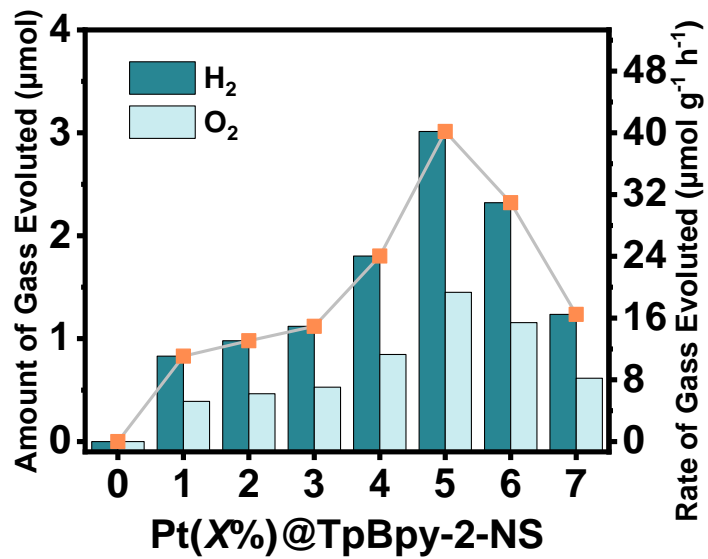

**Supplementary Figure 37.** The photocatalytic overall water splitting activities over Pt(X%)@TpBpy-2-NS (X = 1, 2, 3, 4, 5, 6, 7).

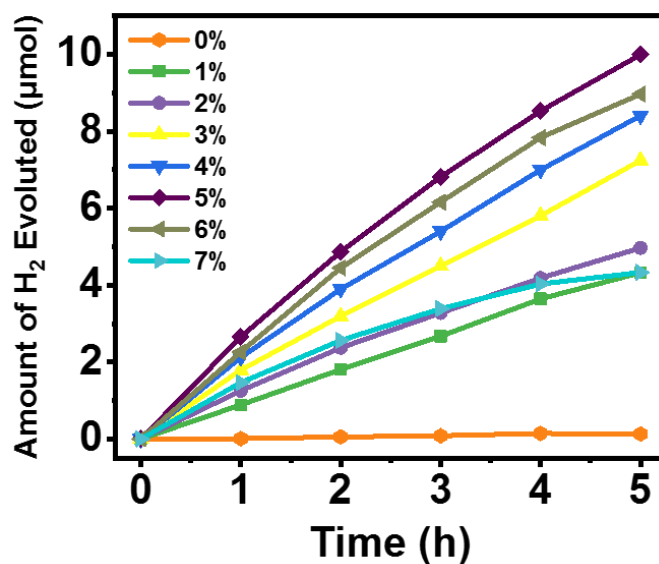

**Supplementary Figure 38.** The photocatalytic overall water splitting hydrogen evolution rates of Pt(X%)@TpBpy-NS as catalyst.

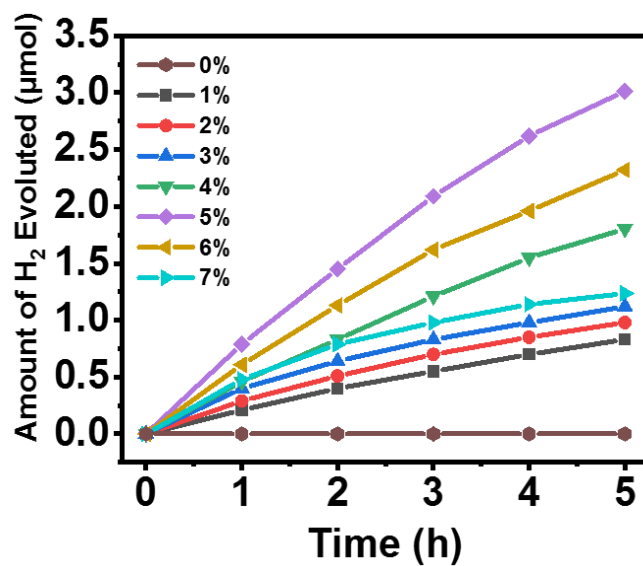

Supplementary Figure 39. The photocatalytic overall water splitting hydrogen evolution rates of Pt(X%)@TpBpy-2-NS as catalyst.

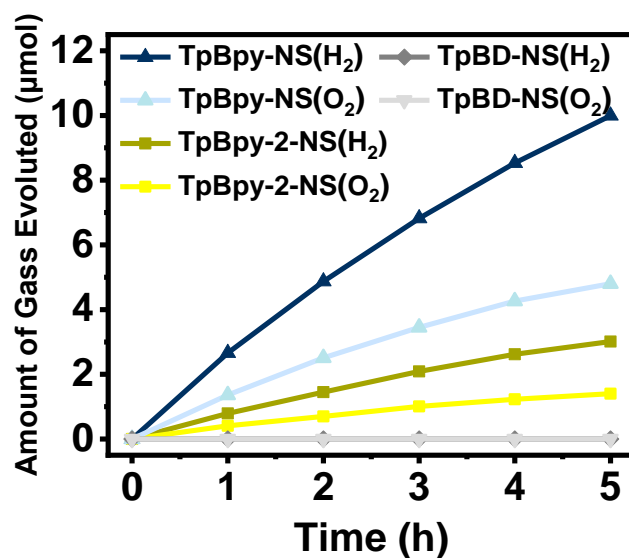

Supplementary Figure 40. The overall water splitting rate over Pt(X%)@COFs-NS.

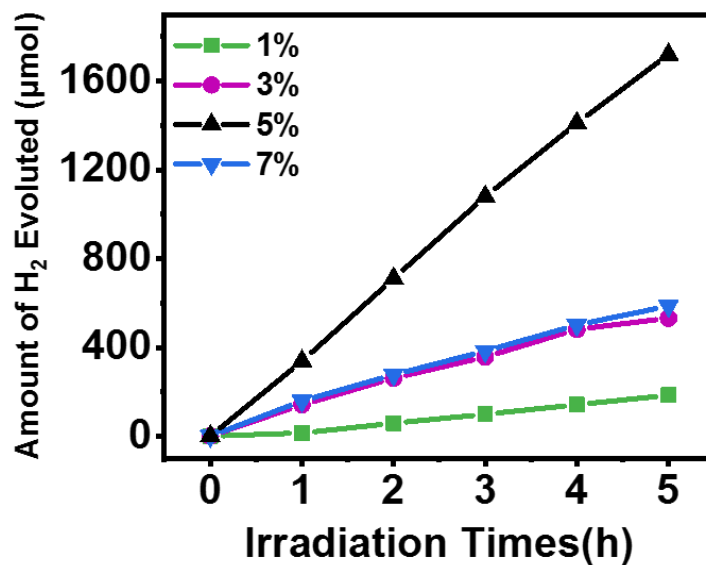

**Supplementary Figure 41.** The photocatalytic hydrogen evolution half-reaction rates of Pt(X%)@TpBpy-NS as catalyst.

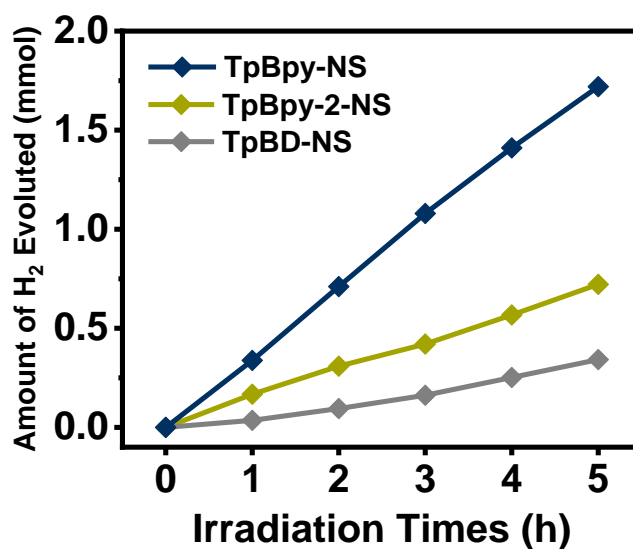

**Supplementary Figure 42.** The H<sub>2</sub> evolution half-reaction rate of Pt@COFs-NS.

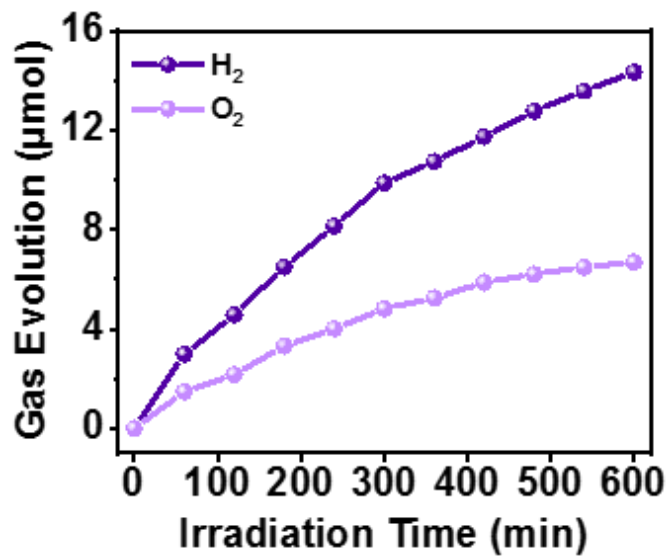

**Supplementary Figure 43.** The successive overall water splitting activity of Pt@TpBpy-NS within 600 min.

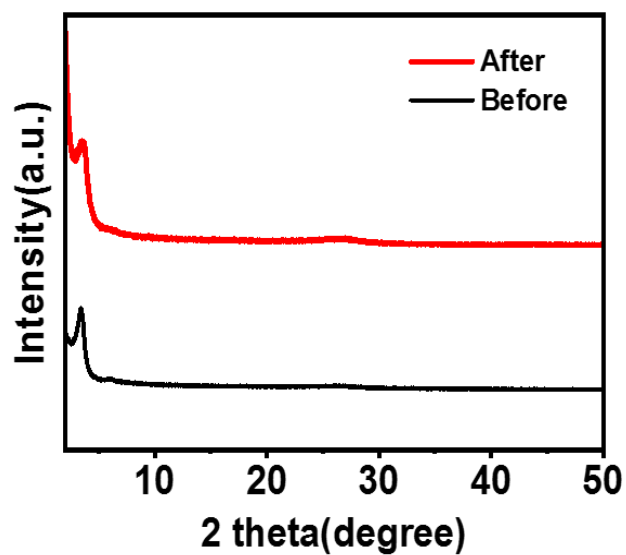

**Supplementary Figure 44.** Experimental XRD patterns of Pt@TpBpy-NS after overall water splitting reaction.

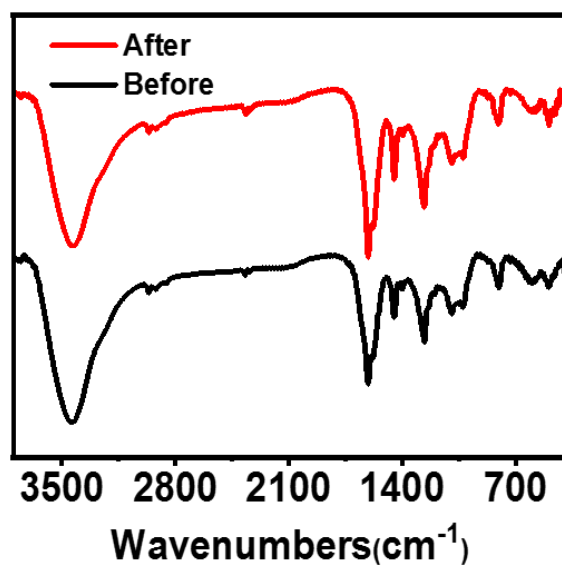

**Supplementary Figure 45.** The FT-IR spectra of Pt@TpBpy-NS after overall water splitting reaction.

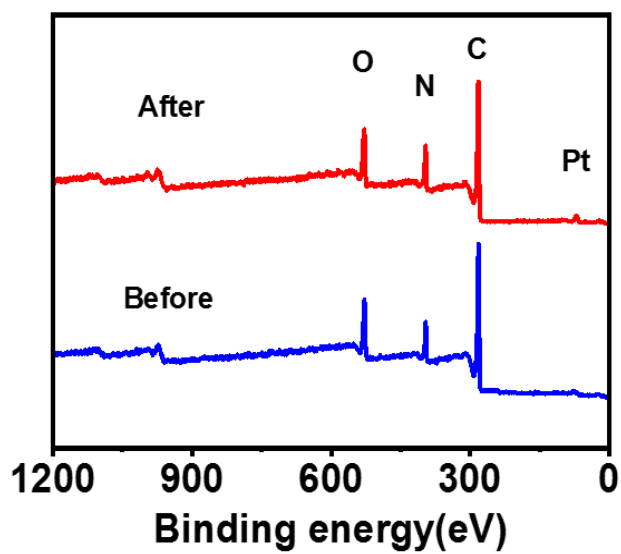

**Supplementary Figure 46.** Survey scan XPS profiles of Pt@TpBpy-NS after overall water splitting reaction.

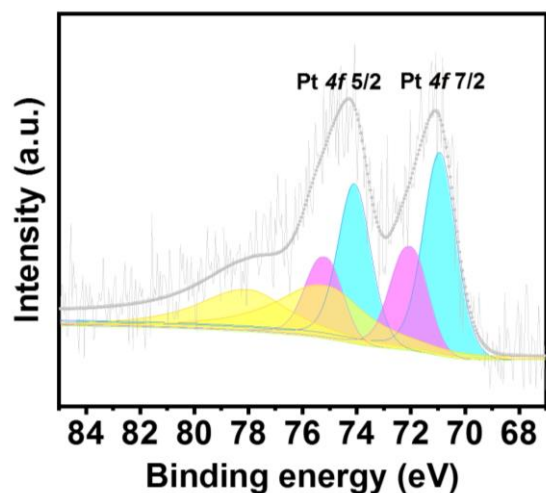

**Supplementary Figure 47.** High resolution Pt 4f XPS profiles of Pt@TpBpy-NS after overall water splitting reaction.

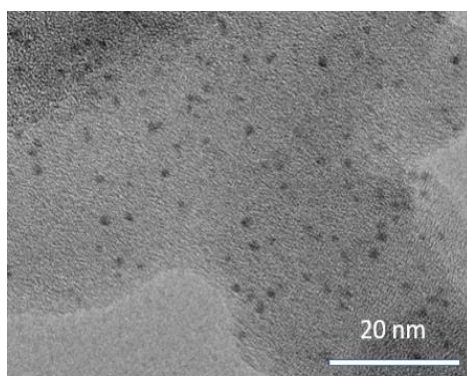

**Supplementary Figure 48.** TEM image of Pt@TpBD-NS after overall water splitting reaction.

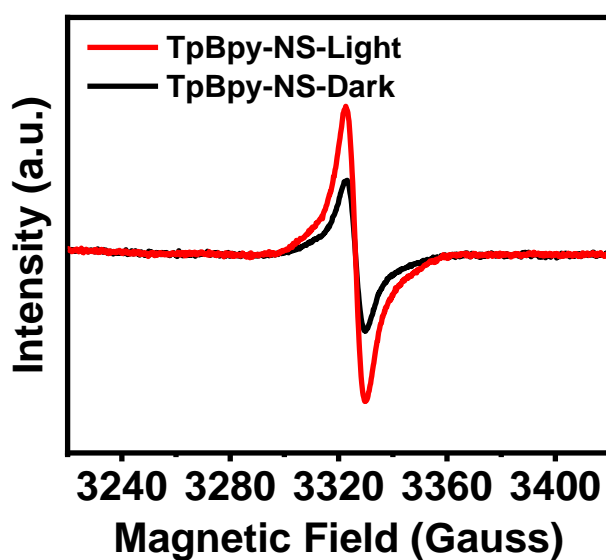

**Supplementary Figure 49.** EPR spectra of TpBpy-NS with or without light-irradiation.

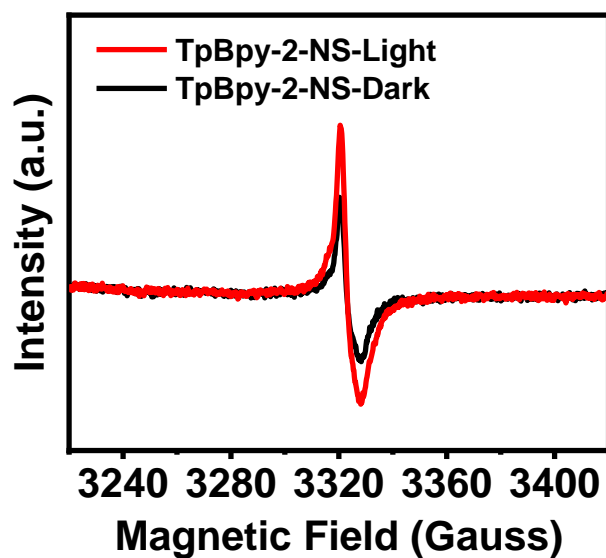

**Supplementary Figure 50.** EPR spectra of TpBpy-2-NS with or without the light-irradiation.

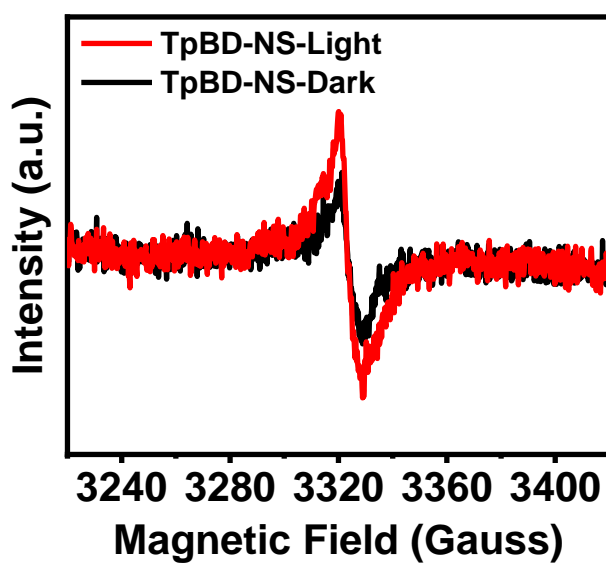

**Supplementary Figure 51.** EPR spectra of TpBD-NS with or without light-irradiation.



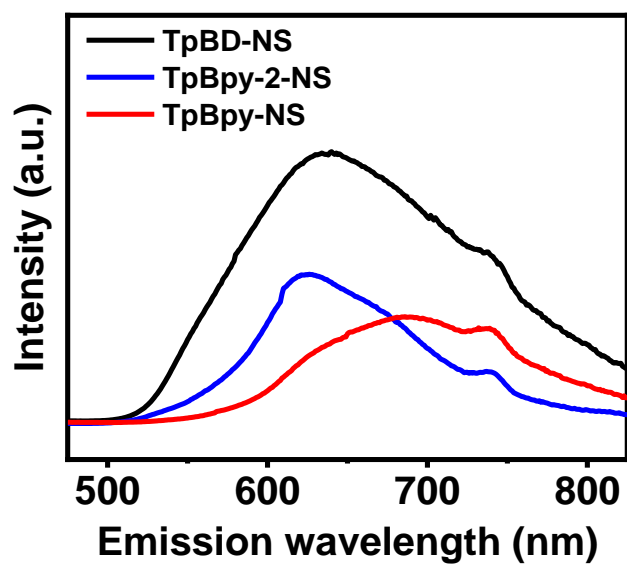

**Supplementary Figure 52.** The PL spectra of TpBD-NS, TpBpy-2-NS and TpBpy-NS.

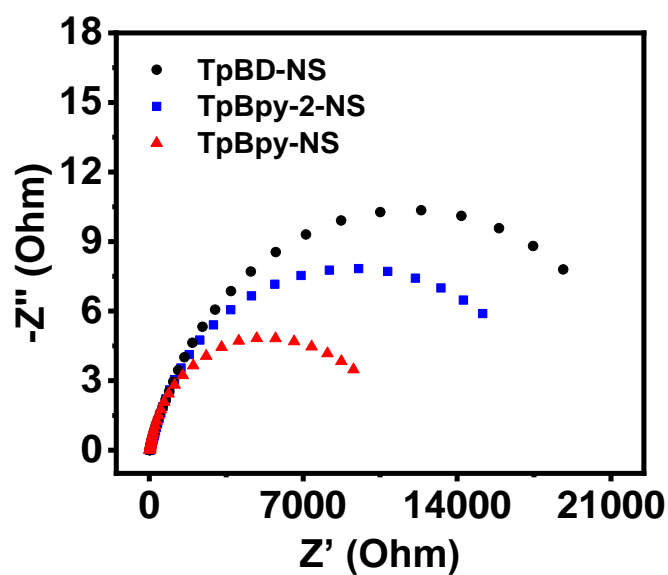

**Supplementary Figure 53.** The EIS spectra of TpBD-NS, TpBpy-2-NS and TpBpy-NS.

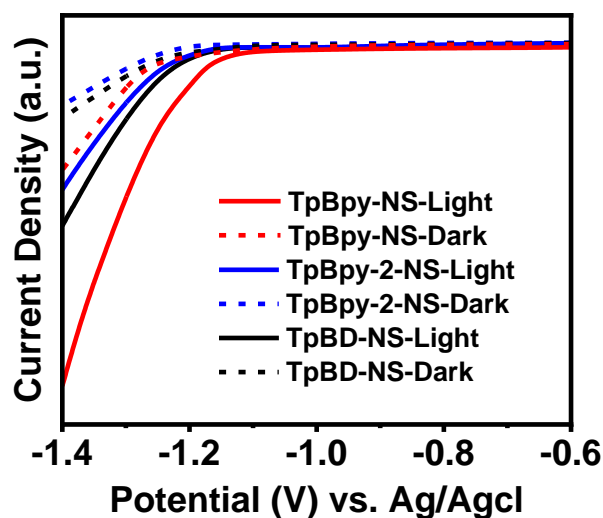

**Supplementary Figure 54.** The I–V curves in dark and under light irradiation of TpBD-NS, TpBpy-2-NS and TpBpy-NS (corresponds to the H<sub>2</sub> evolution).

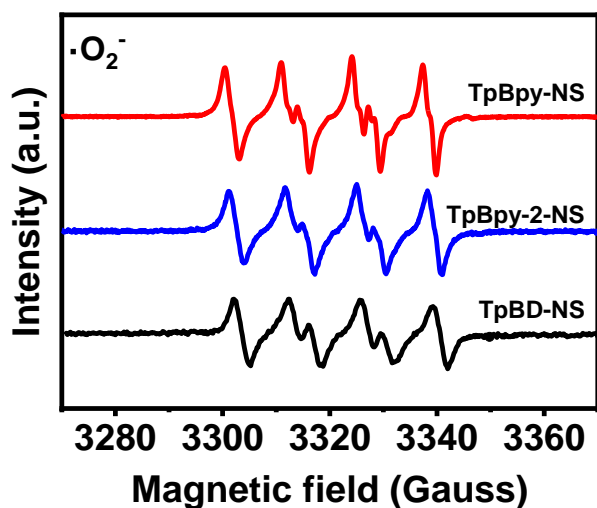

**Supplementary Figure 55.** EPR spectra of  $\cdot\text{O}_2^-$  radical trapped by DMPO over TpBpy-NS, TpBpy-2-NS, and TpBD-NS samples for 3 min.

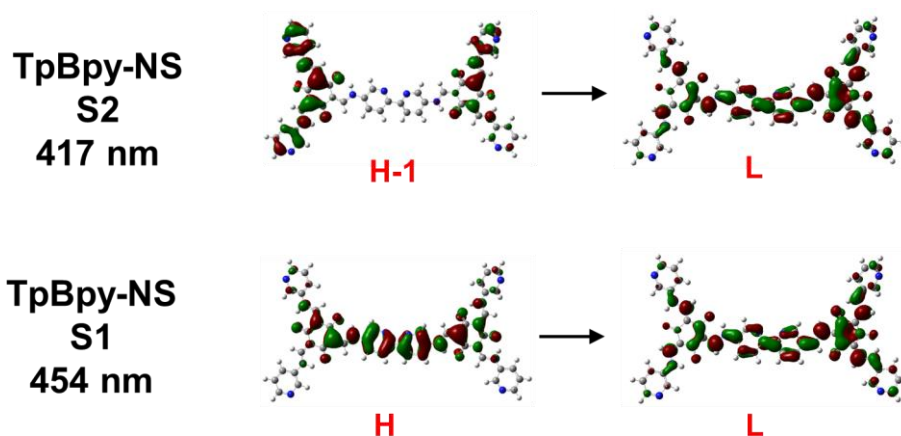

**Figure S56.** The TD-DFT calculated electronic transition of TpBpy-NS.

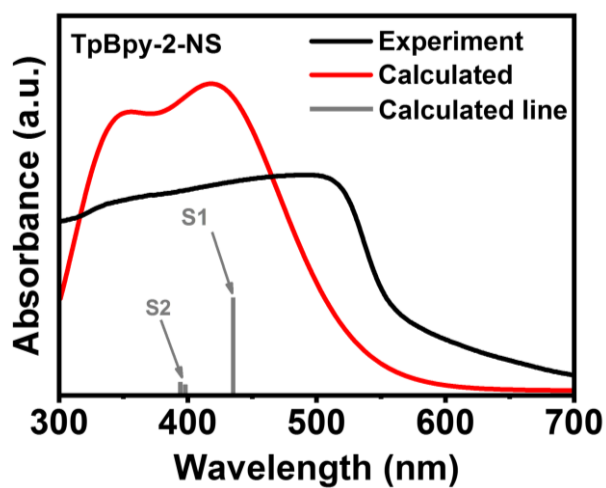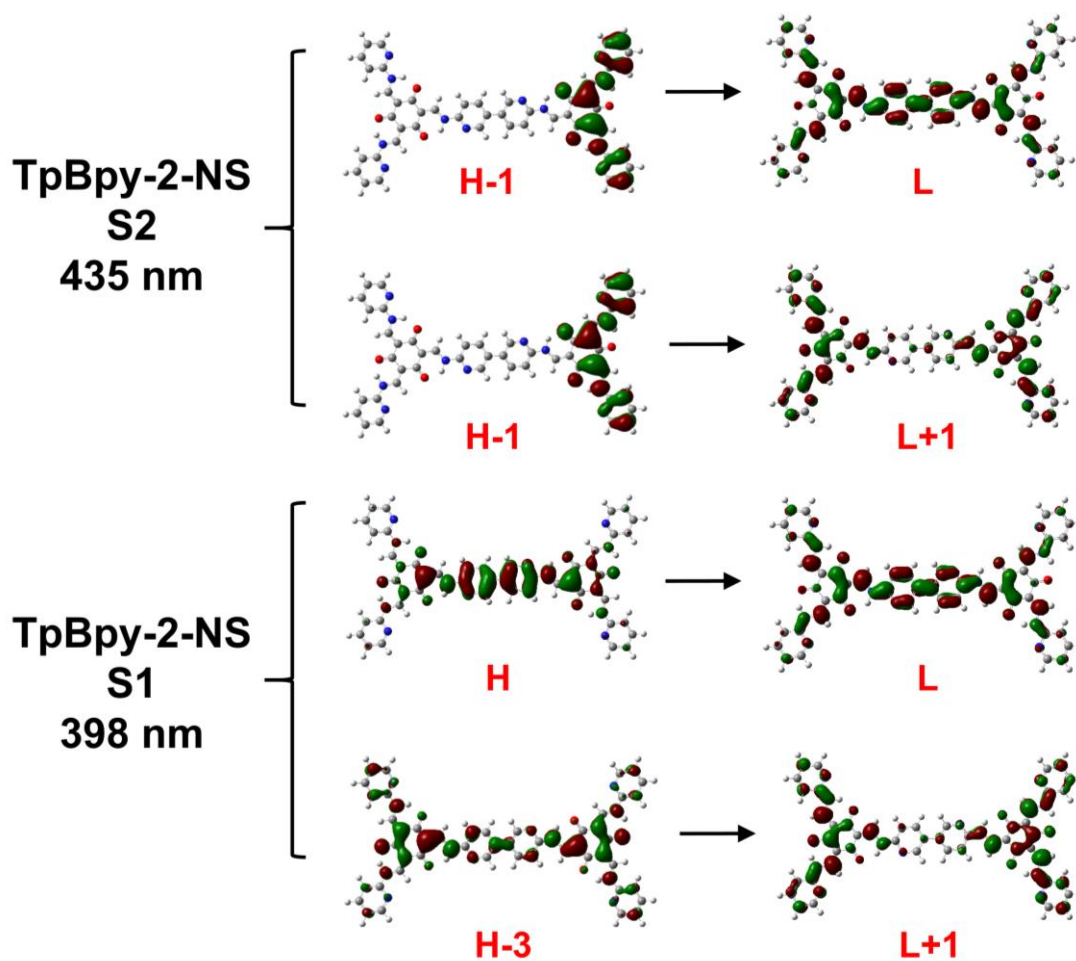

**Supplementary Figure 57.** The TD-DFT calculated electronic transition of TpBpy-2-NS.

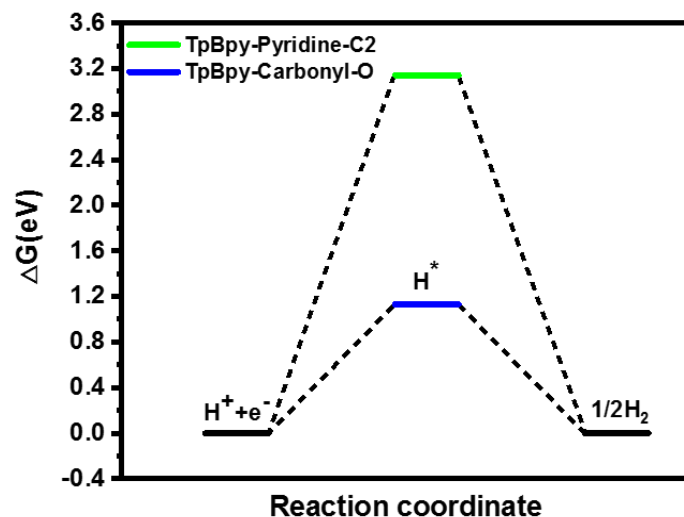

**Supplementary Figure 58.** The calculated Gibbs free energy change of intermediate states involved in HER processes for TpBpy-NS

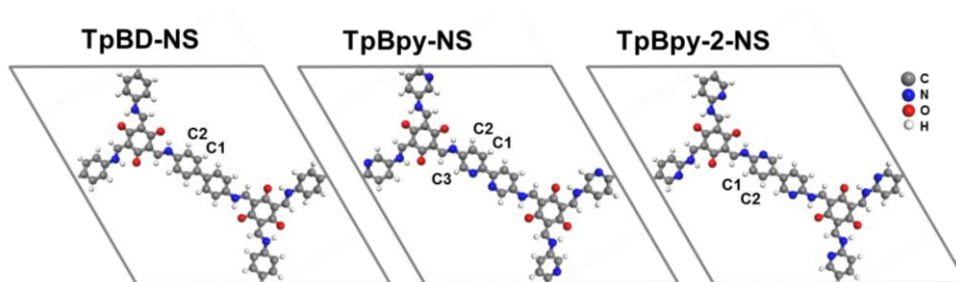

**Supplementary Figure 59.** The optimized structures of TpBD-NS, TpBpy-2-NS and TpBpy-NS.

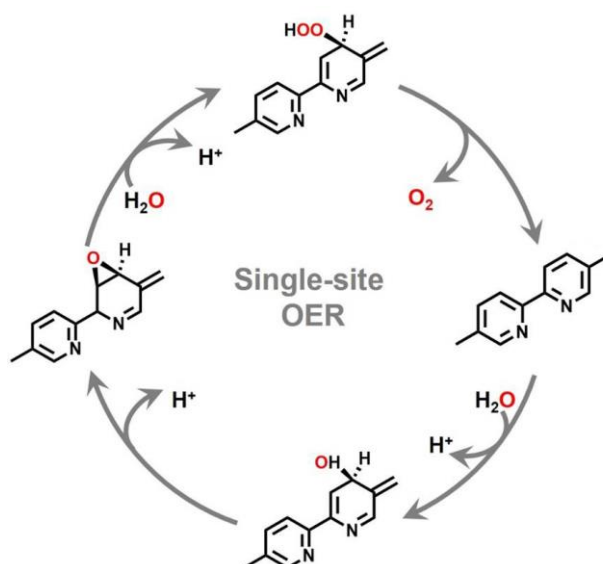

**Supplementary Figure 60.** The possible processes of OER reaction via single-site processes on bipy segment in TpBpy-NS.

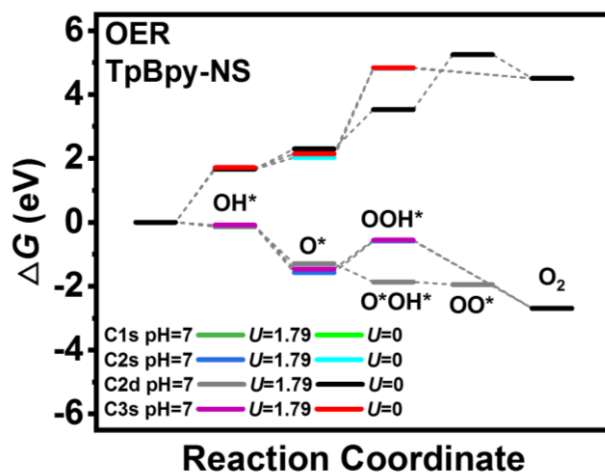

**Supplementary Figure 61.** The calculated Gibbs free energy change of intermediate states involved in OER processes for TpBpy-NS.

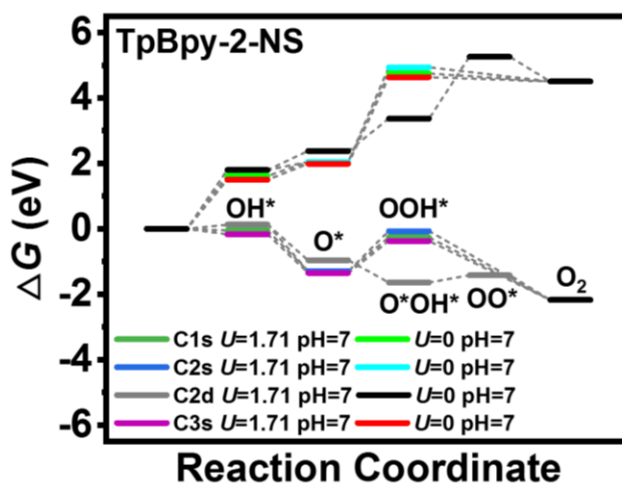

**Supplementary Figure 62.** The calculated Gibbs free energy change of intermediate states involved in OER processes for TpBpy-2-NS.

**Supplementary Table 1.** The Pt element contain analysis through ICP-OES. Content % =  $m(\text{Pt})/m(\text{Sample}) \times 100\%$ .

| Sample                         | Element | Found.( wt %) |
|--------------------------------|---------|---------------|
| Pt(5%)@TpBpy-NS                | Pt      | 1.23          |
| Pt(5%)@TpBpy-2-NS              | Pt      | 1.28          |
| Pt(5%)@TpBD-NS                 | Pt      | 1.19          |
| Pt(5%)@TpBpy-NS-after reaction | Pt      | 1.21          |

**Supplementary Table 2.** Comparison of overall water splitting performance with literature reports

| Catalysts                                                          | Co-catalyst                                                | Light Source                         | H <sub>2</sub> evolution rate (μmol g <sup>-1</sup> h <sup>-1</sup> ) | O <sub>2</sub> evolution rate (μmol g <sup>-1</sup> h <sup>-1</sup> ) | Ref.      |
|--------------------------------------------------------------------|------------------------------------------------------------|--------------------------------------|-----------------------------------------------------------------------|-----------------------------------------------------------------------|-----------|
| Pt@TpBpy-NS                                                        | 1.23 wt.% Pt.                                              | 300 W Xe Lamp<br>λ ≥ 420 nm          | 132                                                                   | 64                                                                    | This Work |
| Pt@TpBpy-2-NS                                                      | 1.28 wt.% Pt.                                              | 300 W Xe Lamp<br>λ ≥ 420 nm          | 41                                                                    | 19                                                                    | This Work |
| CTF-0                                                              | 3 wt.% Pt,<br>6 wt.% Co <sub>3</sub> O <sub>4</sub>        | 300 W Xe Lamp                        | 82                                                                    | 40                                                                    | 1         |
| Pt/g-C <sub>3</sub> N <sub>4</sub>                                 | 3wt.%Pt<br>1wt% CoO <sub>x</sub>                           | 300 W Xe lamp<br>λ ≥ 420 nm          | 6                                                                     | 3                                                                     | 2         |
| Sea-urchin-structure<br>g-C <sub>3</sub> N <sub>4</sub>            | 3wt.%Pt                                                    | 300 W Xe lamp<br>λ ≥ 420 nm          | 41.5                                                                  | 20.3                                                                  | 3         |
| C <sub>3</sub> N <sub>4</sub> /MnO <sub>2</sub>                    | –                                                          | 300 W Xe lamp<br>λ ≥ 420 nm          | 55.3                                                                  | 27.9                                                                  | 4         |
| 3D g-C <sub>3</sub> N <sub>4</sub> NS                              | 1wt.%Pt 3wt.%<br>IrO <sub>2</sub>                          | 300 W Xe lamp<br>λ ≥ 420 nm          | 101.4                                                                 | 49.1                                                                  | 5         |
| g-C <sub>3</sub> N <sub>4</sub> -Carbon Dots                       | –                                                          | 300W Xe lamp<br>λ ≥ 420 nm           | 5                                                                     | 2.5                                                                   | 6         |
| Co <sub>1</sub> phosphide/PCN                                      | –                                                          | 300W Xe lamp<br>λ ≥ 420 nm           | 125                                                                   | 65                                                                    | 7         |
| Ta <sub>3</sub> N <sub>5</sub> /BTON                               | 0.3 wt% Pt<br>0.45wt%<br>PtO <sub>x</sub> /WO <sub>3</sub> | 300 W Xe Lamp<br>λ ≥ 420 nm          | 16                                                                    | 8                                                                     | 8         |
| MnO <sub>2</sub> /Monolayer g-C <sub>3</sub> N <sub>4</sub>        | 3wt.% Pt                                                   | 300W Xe lamp<br>λ > 400nm            | 60.6                                                                  | 28.9                                                                  | 9         |
| CoO/g-C <sub>3</sub> N <sub>4</sub>                                | 10wt.% CoO                                                 | LED<br>λ ≥ 400 nm                    | 5.8                                                                   | 2.6                                                                   | 10        |
| CoO/g-C <sub>3</sub> N <sub>4</sub>                                | 30wt.% CoO                                                 | LED<br>λ ≥ 400 nm                    | 50.2                                                                  | 27.8                                                                  | 11        |
| Pt/CoP/g-C <sub>3</sub> N <sub>4</sub>                             | 3wt.%Pt 3wt.%<br>CoP                                       | 300 W Xe lamp<br>λ ≥ 300nm           | 26.3                                                                  | 12.5                                                                  | 12        |
| g-C <sub>3</sub> N <sub>4</sub> NWBs                               | 1wt.% Pt                                                   | 300 W Xe lamp,<br>λ ≥ 300nm          | 72                                                                    | 35.6                                                                  | 13        |
| TiO <sub>2</sub> /g-C <sub>3</sub> N <sub>4</sub> -WO <sub>3</sub> | 1% PtO <sub>x</sub>                                        | 150W Xe lamp<br>λ > 200 nm           | 29.4                                                                  | 14.3                                                                  | 14        |
| C <sub>3</sub> N <sub>4</sub> -rGO-WO <sub>3</sub>                 | 1wt.% Pt                                                   | 250W metal halide<br>lamp, λ ≥ 420nm | 14.2                                                                  | 7.3                                                                   | 15        |

## Supplementary References

1. Kong, D. et al. Stable complete water splitting by covalent triazine-based framework CTF-0. *Chemcatchem* **12**, 2708-2712 (2020).
2. Zhang, G. et al. Overall water splitting by Pt/gC<sub>3</sub>N<sub>4</sub> photocatalysts without using sacrificial agents. *Chem. Sci.* **7**, 3062–3066 (2016).
3. Zeng, Y. et al. Sea-urchin-structure g-C<sub>3</sub>N<sub>4</sub> with narrow bandgap (~2.0 eV) for efficient overall water splitting under visible light irradiation. *Appl. Catal., B-Environ.* **249**, 275–281 (2019).
4. Liu, J. et al. A critical study of the generality of the two step two electron pathway for water splitting by application of a C<sub>3</sub>N<sub>4</sub>/MnO<sub>2</sub> photocatalyst. *Nanoscale* **8**, 11956–11961 (2016).
5. Chen, X. et al. Three-dimensional porous g-C<sub>3</sub>N<sub>4</sub> for highly efficient photocatalytic overall water splitting. *Nano Energy* **59**, 644–650 (2019).
6. Qu, D. et al. Peering into water splitting mechanism of g-C<sub>3</sub>N<sub>4</sub>-carbon dots metal-free photocatalyst. *Appl. Catal., B-Environ.* **227**, 418–424 (2018).
7. Liu, W. et al. Single-site active cobalt-based photocatalyst with a long carrier lifetime for spontaneous overall water splitting. *Angew. Chem., Int. Ed.* **56**, 9312–9317 (2017).
8. Dong, B. et al. Heterostructure of 1D Ta<sub>3</sub>N<sub>5</sub> nanorod/BaTaO<sub>2</sub>N nanoparticle fabricated by a one-step ammonia thermal route for remarkably promoted solar hydrogen production. *Adv. Mater.* **31**, 1808185 (2019).
9. Mo, Z. et al. Construction of MnO<sub>2</sub>/Monolayer g-C<sub>3</sub>N<sub>4</sub> with Mn vacancies for Z-scheme overall water splitting. *Appl. Catal., B-Environ.* **241**, 452–460 (2019).
10. Han, M. et al. One-step synthesis of CoO/g-C<sub>3</sub>N<sub>4</sub> composites by thermal decomposition for overall water splitting without sacrificial reagents. *Inorg. Chem. Front.* **4**, 1691–1696 (2017).
11. Guo, F. et al. CoO and g-C<sub>3</sub>N<sub>4</sub> complement each other for highly efficient overall water splitting under visible light. *Appl. Catal., B-Environ.* **226**, 412–420 (2018).
12. Pan, Z. et al. Decorating CoP and Pt nanoparticles on graphitic carbon nitride nanosheets to promote overall water splitting by conjugated polymers. *ChemSusChem* **10**, 87–90 (2017).
13. Zhang, K. et al. Tunable bandgap energy and promotion of H<sub>2</sub>O<sub>2</sub> oxidation for overall water splitting from carbon nitride nanowire bundles. *Adv. Energy Mater.* **6**, 1502352 (2016).
14. Yan, J. et al. Fabrication of TiO<sub>2</sub>/C<sub>3</sub>N<sub>4</sub> heterostructure for enhanced photocatalytic Z-scheme overall water splitting. *Appl. Catal., B-Environ.* **191**, 130–137 (2016).
15. Zhao, G. et al. Facile structure design based on C<sub>3</sub>N<sub>4</sub> for mediator-free Z-scheme water splitting under visible light. *Catal.: Sci. Technol.* **5**, 3416–3422 (2015).
